# Supplementary material
Source: PubMed Central journal article supplement (PMC3125987)
Supplement: NIHMS295348-supplement-supplement.pdf [file NIHMS295348-supplement-supplement.pdf]

## APPENDIX

Here we generalized the results of Ghosh and Lin (2000) to obtain the decomposition of  $\sqrt{m}\{\hat{F}_1(t) - F_1(t)\}$  for clustered competing risks data. We define the following random processes:

$$dM_{1ik}(t) = dN_{1ik}(t) - Y_{1ik}(t)dH_1(t), \text{ and } dM_{ik}(t) = dN_{ik}(t) - Y_{ik}(t)dH(t).$$

Let  $M_{1ik}(t) = \int_0^t dM_{1ik}(u)$  and  $M_{ik}(t) = \int_0^t dM_{ik}(u)$ . Since event times for individuals within the

same cluster are correlated, both  $M_{1ik}(t)$  and  $M_{ik}(t)$  are no longer martingales with respect to the overall joint filtration  $\mathcal{F}_t = \vee_{i=1}^n \vee_{k=1}^{n_i} \sigma\{Y_{ik}(s), N_{ik}(s) : 0 \leq s \leq t\}$ . Therefore, the martingale central limit theory cannot be applied. Following the procedure of Ghosh and Lin (2000), we have the following equation

$$\sqrt{m}\{\hat{F}_1(t) - F_1(t)\} = \sqrt{m} \left[ \int_0^t S(u) d\{\hat{H}_1(u) - H_1(u)\} - \int_0^t \{\hat{H}(u) - H(u)\} dF_1(u) \right] + o_p(1).$$

Using results from empirical processes (Pollard, 1984; Spiekerman and Lin, 1998), both

$\{\hat{H}_1(u) - H_1(u)\}$  and  $\{\hat{H}(u) - H(u)\}$  can be decomposed into a sum of mean zero random variables. Therefore, we have

$$\sqrt{m}\{\hat{F}_1(t) - F_1(t)\} = \sum_{i=1}^n \sum_{k=1}^{n_i} Z_{ik}(t) + o_p(1), \quad (\text{A.1})$$

where

$$Z_{ik}(t) = m^{-1/2} \int_0^t \frac{S(u)}{y(u)} dM_{1ik}(u) + m^{-1/2} \int_0^t \frac{F_1(u) - F_1(t)}{y(u)} dM_{ik}(u),$$

and  $y(t) = P(t \leq X_{ik})$ . For any fixed time  $t$ , by the law of large numbers for a weakly dependent series (Feller, 1957),  $\hat{F}_1(t) - F_1(t)$  converges to zero in probability. Therefore,  $\hat{F}_1(t)$  is a consistent estimator for the cumulative incidence function  $F_1(t)$ .

Since the decomposed terms  $Z_{ik}(t)$  only depend on observation  $k$  in cluster  $i$ , they are correlated within the same cluster, but independent between different clusters. By using the methods for the clustered linear statistic (Williams, 2000), the between-cluster variance estimator of the linear statistic  $Z(t) = \sum_{i=1}^n \sum_{k=1}^{n_i} Z_{ik}(t)$  is given by  $\hat{V}(t) = \frac{n}{n-1} \sum_{i=1}^n \left\{ \hat{Z}_{i\cdot}(t) - \bar{Z}_{\cdot\cdot}(t) \right\}^2$ ,

where  $\hat{Z}_{i\cdot}(t) = \sum_{k=1}^{n_i} \hat{Z}_{ik}(t)$ , and  $\bar{Z}_{\cdot\cdot}(t) = \frac{1}{n} \sum_{i=1}^n \hat{Z}_{i\cdot}(t)$ . Since,

$$\begin{aligned} E\{\hat{V}(t)\} &= \frac{n}{n-1} \left( \sum_{i=1}^n E \left\{ \sum_k \hat{Z}_{ik}(t) \right\}^2 - n E \left\{ \frac{1}{n} \sum_{i=1}^n \sum_k \hat{Z}_{ik}(t) \right\}^2 \right) \\ &= \frac{n}{n-1} \left( \sum_{i=1}^n \sum_{k_1=1}^{n_i} \sum_{k_2=1}^{n_i} E \hat{Z}_{ik_1}(t) \hat{Z}_{ik_2}(t) - \frac{1}{n} \sum_{i=1}^n \sum_{k_1=1}^{n_i} \sum_{k_2=1}^{n_i} E \hat{Z}_{ik_1}(t) \hat{Z}_{ik_2}(t) \right) \\ &= \sum_{i=1}^n \sum_{k_1=1}^{n_i} \sum_{k_2=1}^{n_i} E \hat{Z}_{ik_1}(t) \hat{Z}_{ik_2}(t) \\ &= \sum_{i=1}^n \text{var} \left\{ \sum_k Z_{ik}(t) \right\}, \end{aligned}$$

we conclude that  $\hat{V}(t)$  is a consistent estimator for the variance of  $Z(t)$ .

For the variance of the Gray test under the null, assuming that process  $\widehat{W}(t)$  converges to  $W(t)$  in probability, and  $\frac{m_0}{m} \rightarrow \rho_0$  as  $m \rightarrow \infty$ , we show that  $\hat{Q}_G$  can be rewritten as sum of

some mean zero random variables:

$$\begin{aligned} \hat{Q}_G &= \sqrt{\frac{m_1 m_0}{m}} \int \widehat{W}(t) d \left\{ \widehat{F}_1^{(1)}(t) - \widehat{F}_1^{(0)}(t) \right\} \\ &= \sqrt{\frac{m_1 m_0}{m}} \left[ \int W(t) d \left\{ \widehat{F}_1^{(1)}(t) - F_1^{(1)}(t) \right\} - \int W(t) d \left\{ \widehat{F}_1^{(0)}(t) - F_1^{(0)}(t) \right\} \right] + o_p(1) \quad (\text{A.2}) \\ &= \frac{1}{\sqrt{m}} \sum_{i=1}^n \sum_{k=1}^{n_i} g_{ik} \int W(t) dZ_{ik}(t) + o_p(1). \end{aligned}$$

By applying the robust variance estimator method of Williams (2000) to equation (A.2), one can consistently estimate the variance for test statistics  $\hat{Q}_G$  by

$$\hat{V}_G = \frac{1}{m} \times \frac{n}{n-1} \sum_{i=1}^n \left\{ \sum_{k=1}^{n_i} g_{ik} \int \widehat{W}(t) d\widehat{Z}_{ik}(t) - \int \widehat{W}(t) d\widehat{Z}_{..}^*(t) \right\}^2,$$

When individuals in groups 0 and 1 are from different clusters, above formula reduce to

$$\hat{V}_G = \frac{1}{m} \sum_{g=0}^1 \frac{m_{1-g} n^{(g)}}{m_g (n^{(g)} - 1)} \sum_{i=1}^{n^{(g)}} \left[ \int \widehat{W}(t) \left\{ d\widehat{Z}_{i\cdot}^{(g)}(t) - d\widehat{Z}_{..}^{(g)}(t) \right\} \right]^2.$$

Similarly, the robust variance for test statistics  $\hat{Q}_{PM}$  can be consistently estimated by

$$\hat{V}_{PM} = \frac{1}{m} \times \frac{n}{n-1} \sum_{i=1}^n \left\{ \sum_{k=1}^{n_i} g_{ik} \int \widehat{W}(t) \widehat{Z}_{ik}(t) dt - \int \widehat{W}(t) \widehat{Z}_{..}^*(t) dt \right\}^2,$$

and

$$\hat{V}_{PM} = \frac{1}{m} \sum_{g=0}^1 \frac{m_{1-g} n^{(g)}}{m_g (n^{(g)} - 1)} \sum_{i=1}^{n^{(g)}} \left[ \int \widehat{K}(t) \left\{ \widehat{Z}_{i\cdot}^{(g)}(t) - \widehat{Z}_{..}^{(g)}(t) \right\} dt \right]^2,$$

when individuals in groups 0 and 1 are from different clusters.
